# Supplementary material
Source: HighWire-hosted journal article supplement (https://bmjopenquality.bmj.com/content/11/1/e001617)

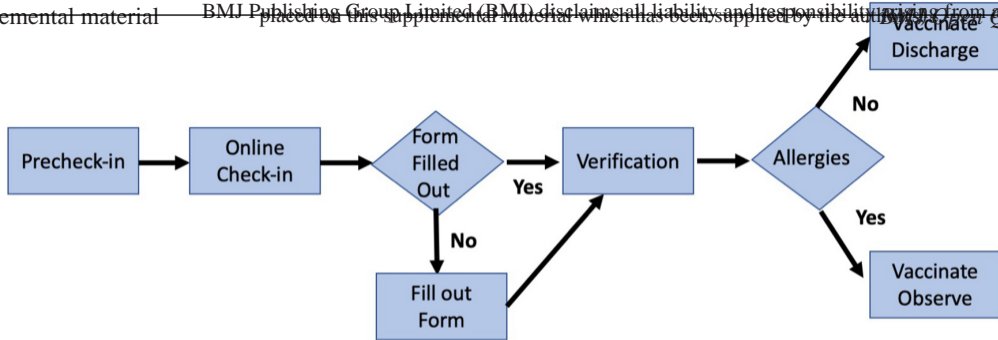

Supplement: inline-supplementary-material-6 [file inline-supplementary-material-6.pdf]
